# Supplementary material
Source: Copernicus journal article supplement (doi:10.5194/egusphere-2026-2701)
Supplement: Supplementary file 1 [file egusphere-2026-2701-supplement.pdf]

## SUPPLEMENTARY MATERIAL OF:

### Convective activity within a tropical cyclone undergoing extratropical transition over a warmer ocean.

Pedro Gómez-Plasencia<sup>1</sup>, Ernesto Javier Rodríguez-Acosta<sup>1</sup>, Juan Jesús González-Alemán<sup>2</sup>, Carlos Calvo-Sancho<sup>3</sup>, Pedro Bolgiani<sup>4</sup>, Javier Díaz-Fernández<sup>1,2</sup>, Ana Montoro-Mendoza<sup>1,2</sup>, María Luisa Martín<sup>1</sup>, Íñigo Gómara<sup>1</sup>

Correspondence to: Pedro Gómez-Plasencia ([pedrogp@uva.es](mailto:pedrogp@uva.es))

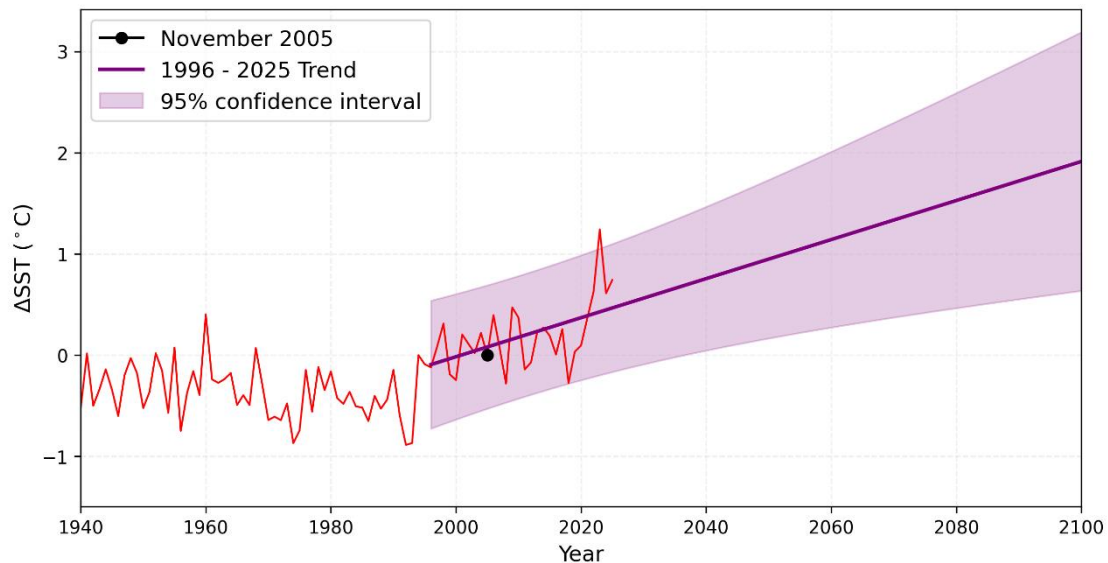

10 **Figure S1:** Evolution of the anomaly of November mean SSTs in the North Atlantic region [20°-35° N, 50°-10° W] relative to November 2005, based on the HadISST dataset. The purple line indicates the 1996-2025 trend extrapolated throughout the 21st century, with shading representing the 95% confidence interval.

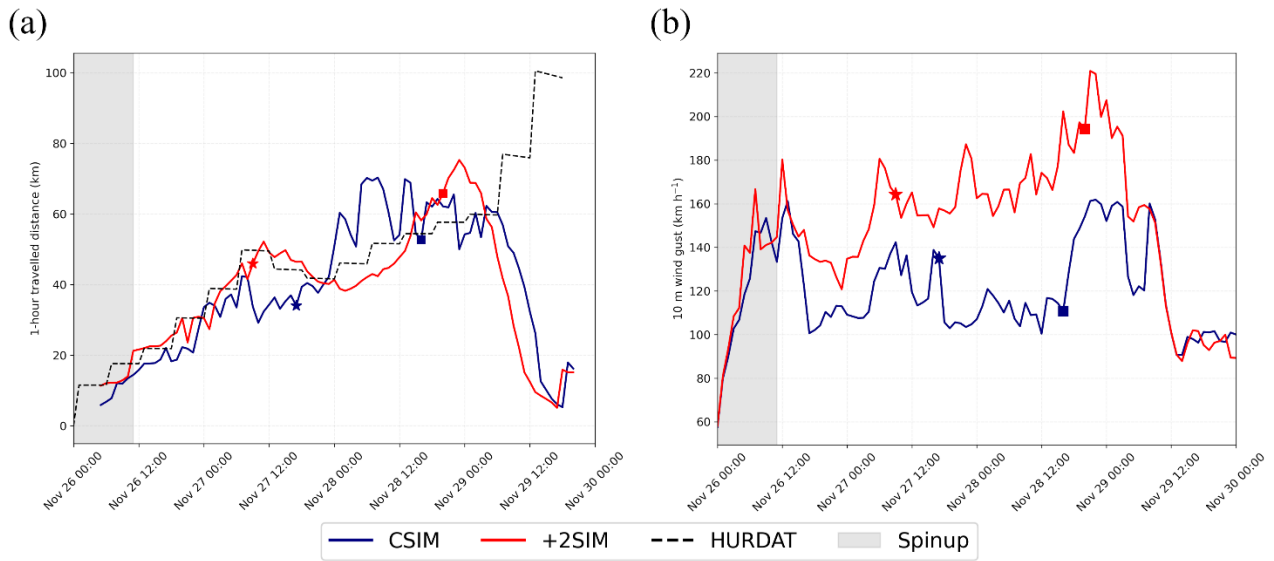

15 **Figure S2:** Comparison of (a) 1 h travelled distance (simulation results are smoothed with 10 h running means), (b) maximum 10 m wind gust, for Delta in both simulations. Stars and squares denote the beginning and the end of the ET, respectively, in both scenarios.

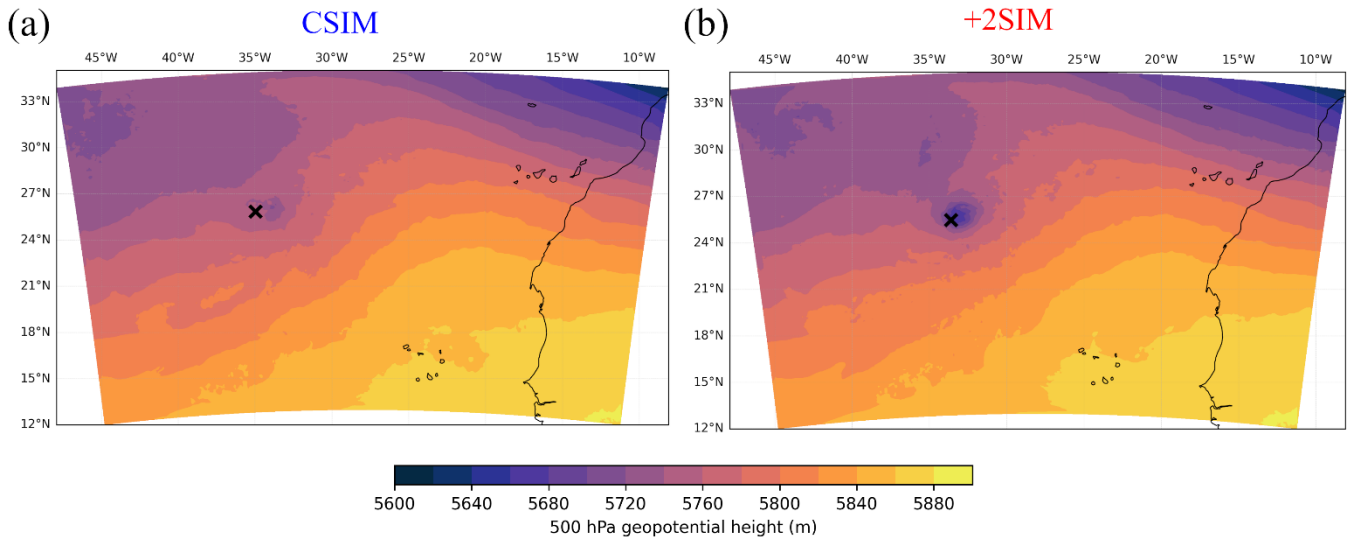

20 **Figure S3:** 500 hPa geopotential height field at 08:00 UTC 28 November for (a) CSIM, (b) +2SIM. Black cross marks for the cyclone position at that timestep.

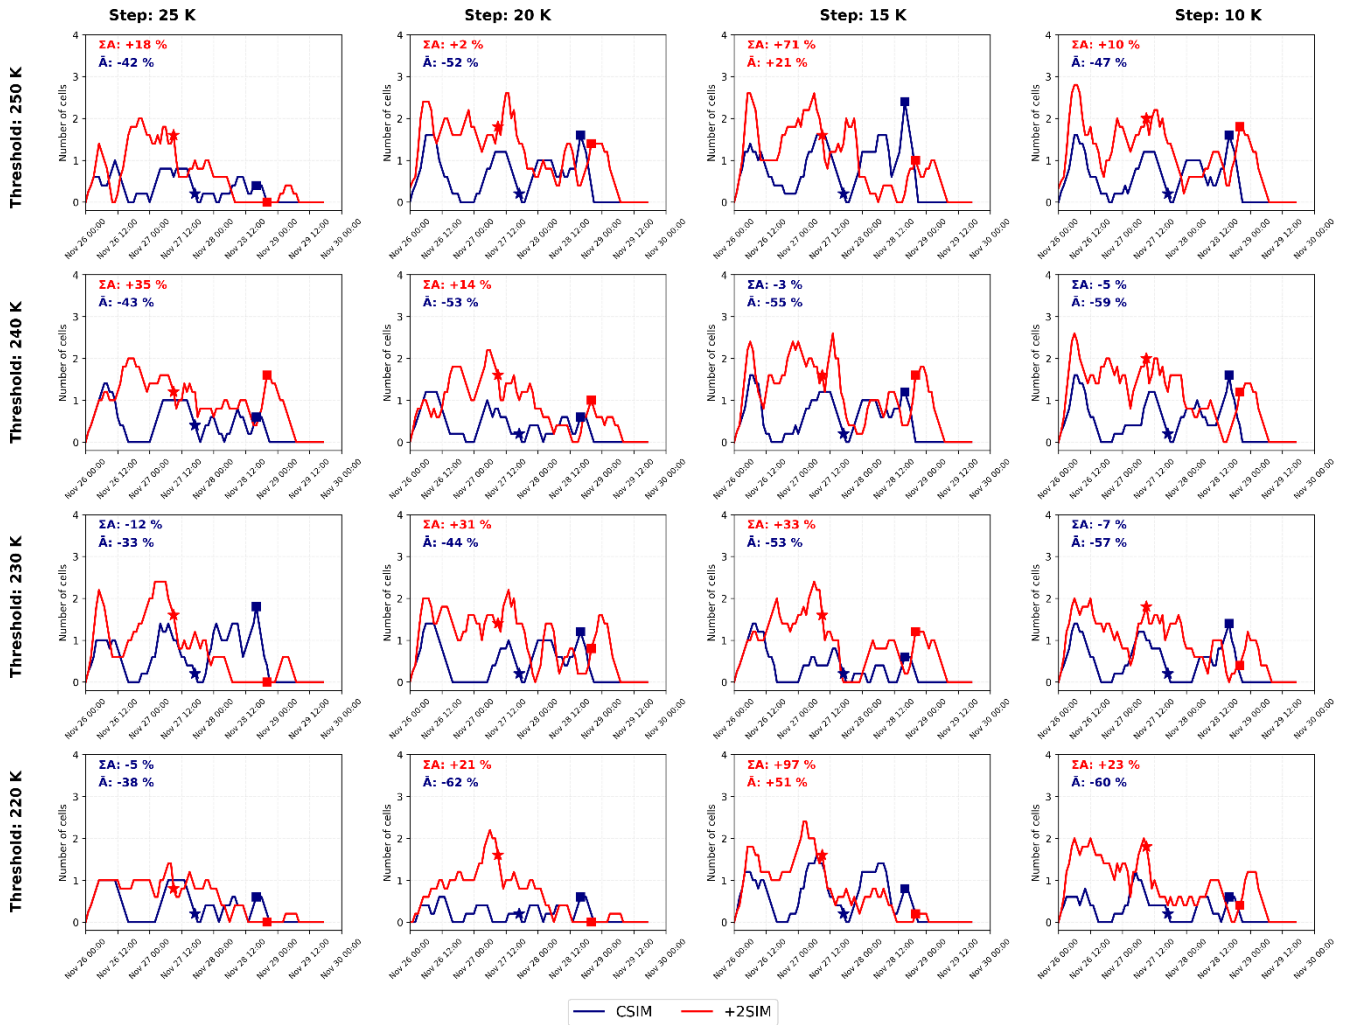

**Figure S4:** Evolution of the number of convective cells with CI identified in Delta in both simulations for all the BT threshold-step combinations, smoothed with 5-hour running means. In the top-left corner numbers indicate the percentage of change in the total and mean area occupied by those cells in +2SIM relative to CSIM, in red when it is an increase and blue when it is a decrease. Stars and squares denote the beginning and end of the ET, respectively, in both scenarios.

25

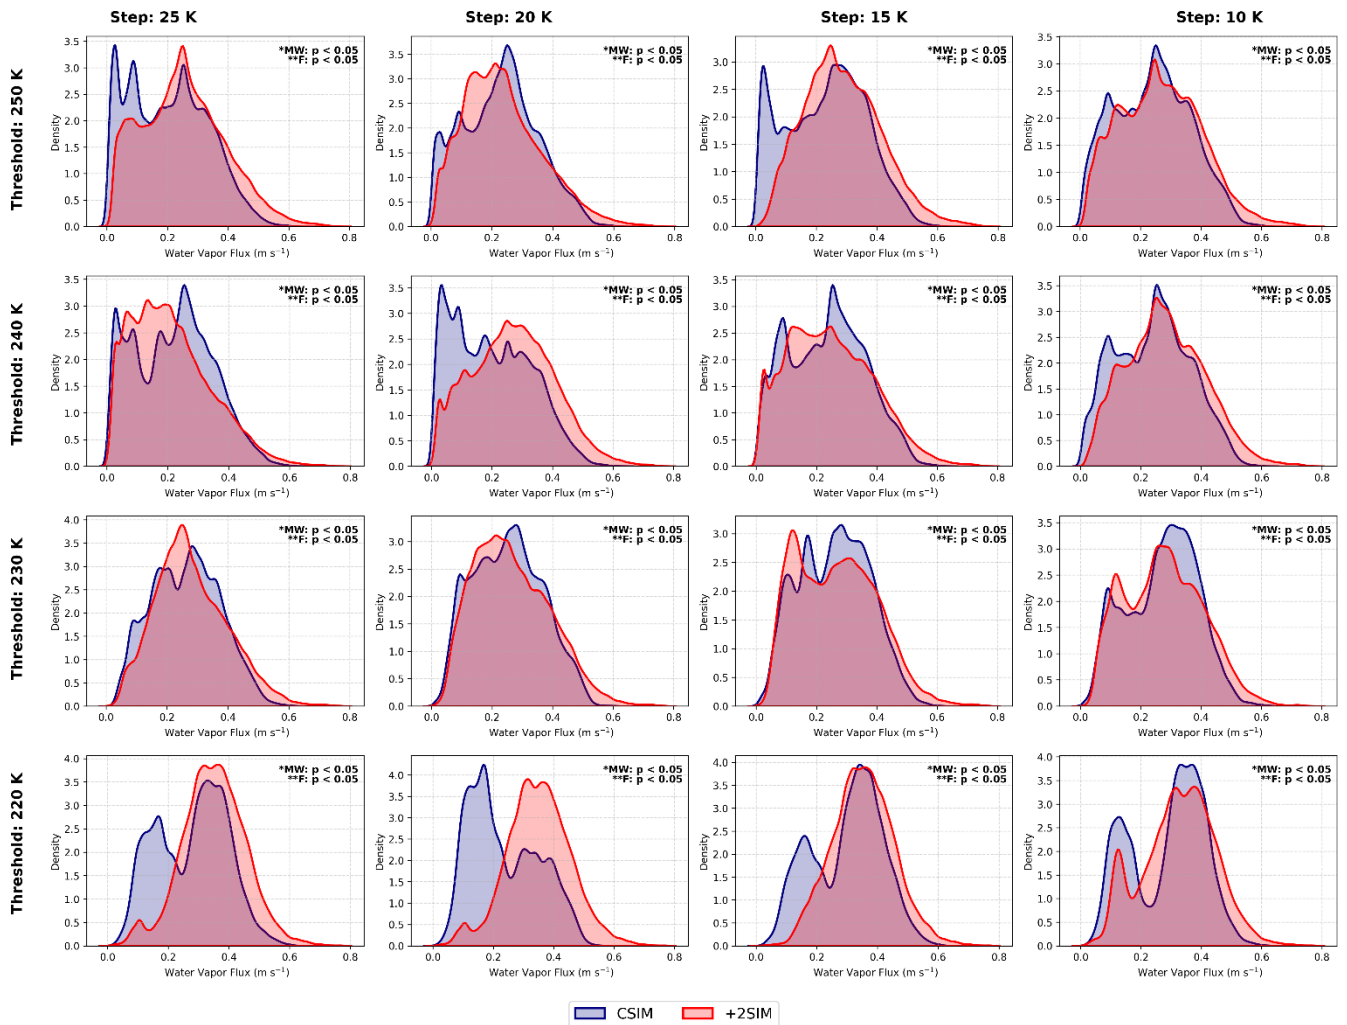

30 **Figure S5:** Comparison of the PDFs of the  $WVFlux$  at 925 hPa ( $\text{m s}^{-1}$ ) in Delta's convective cells in both simulations for all the BT threshold-step combinations. In the top-right corner of the PDFs the symbol \* denotes a significant difference in the distributions while two asterisks \*\* denote a significant difference in the variances, with p-values  $< 0.05$  according to the Mann-Whitney and Fisher tests, respectively.

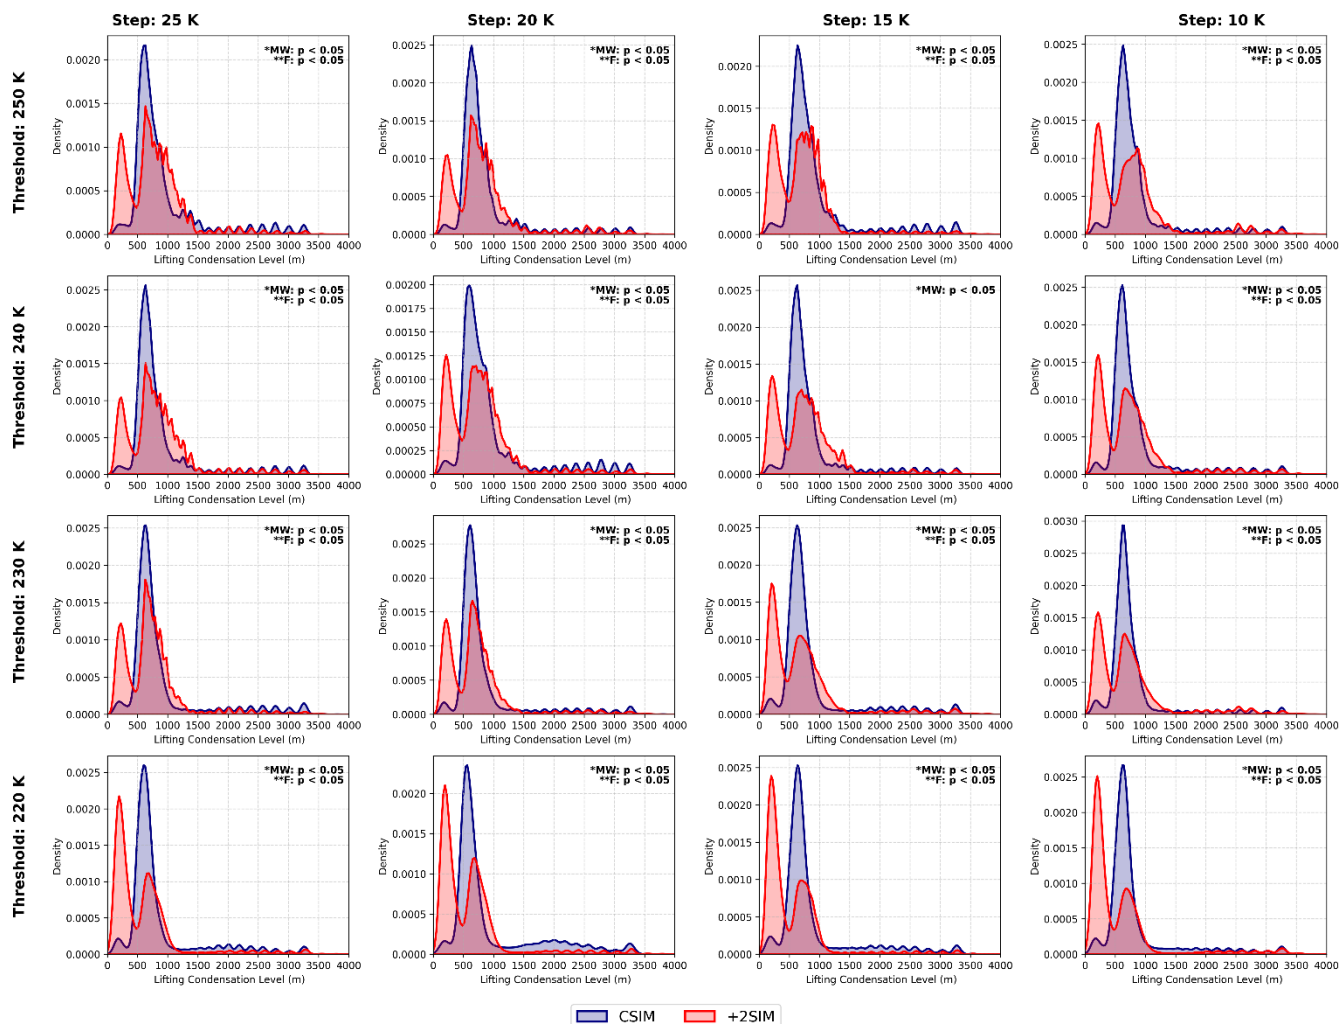

35 Figure S6: Same as Fig. S5 but for the LCL (m).

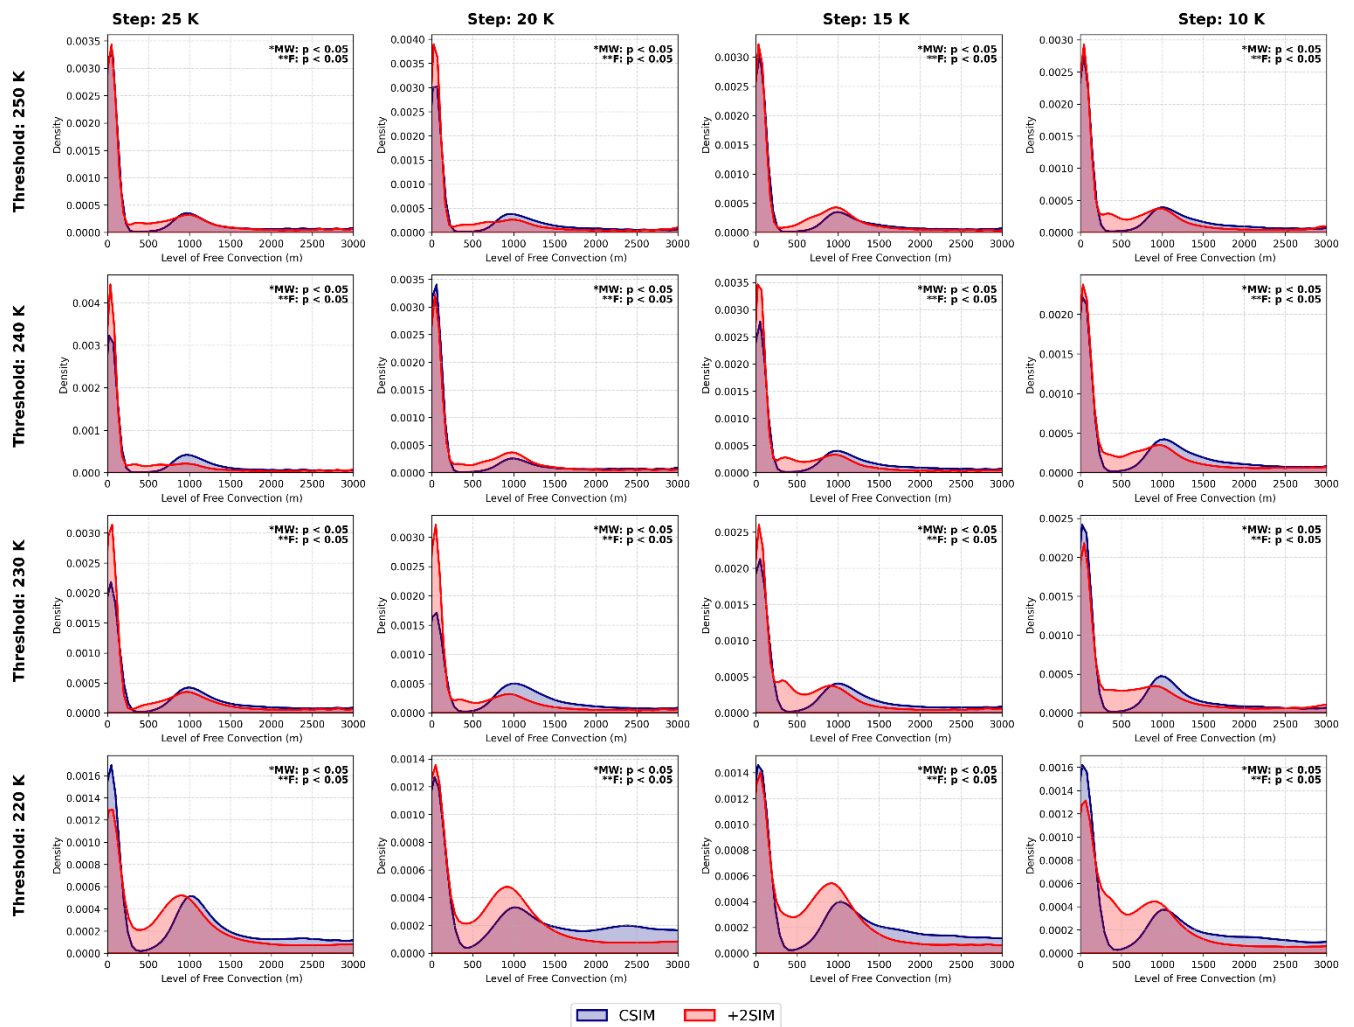

Figure S7: Same as Fig. S5 but for the LFC (m).

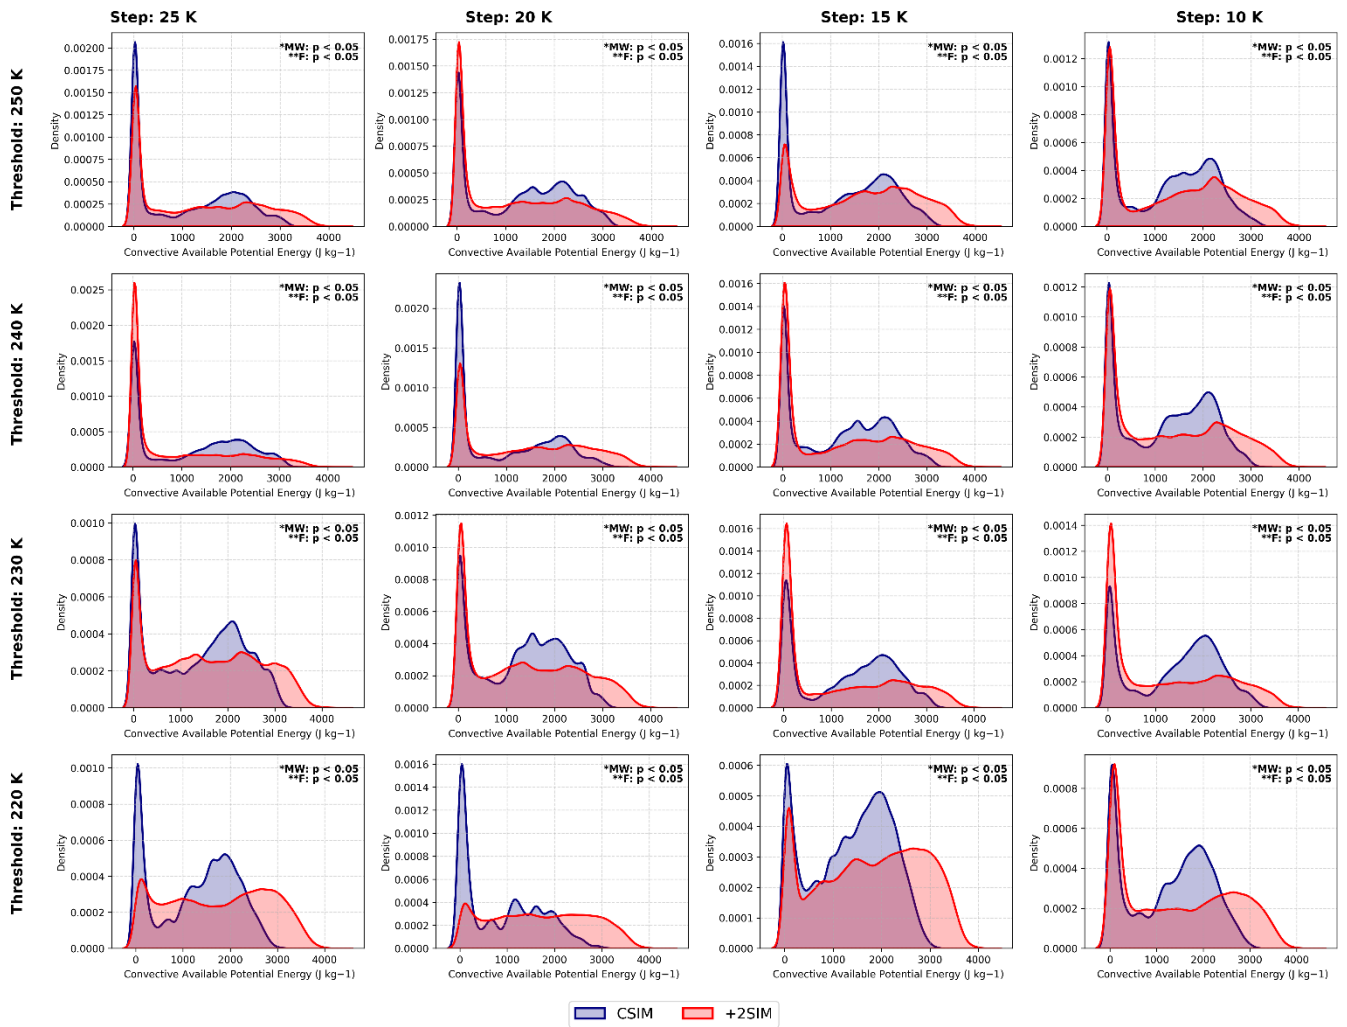

40

Figure S8: Same as Fig. S5 but for the CAPE ( $\text{J kg}^{-1}$ ).

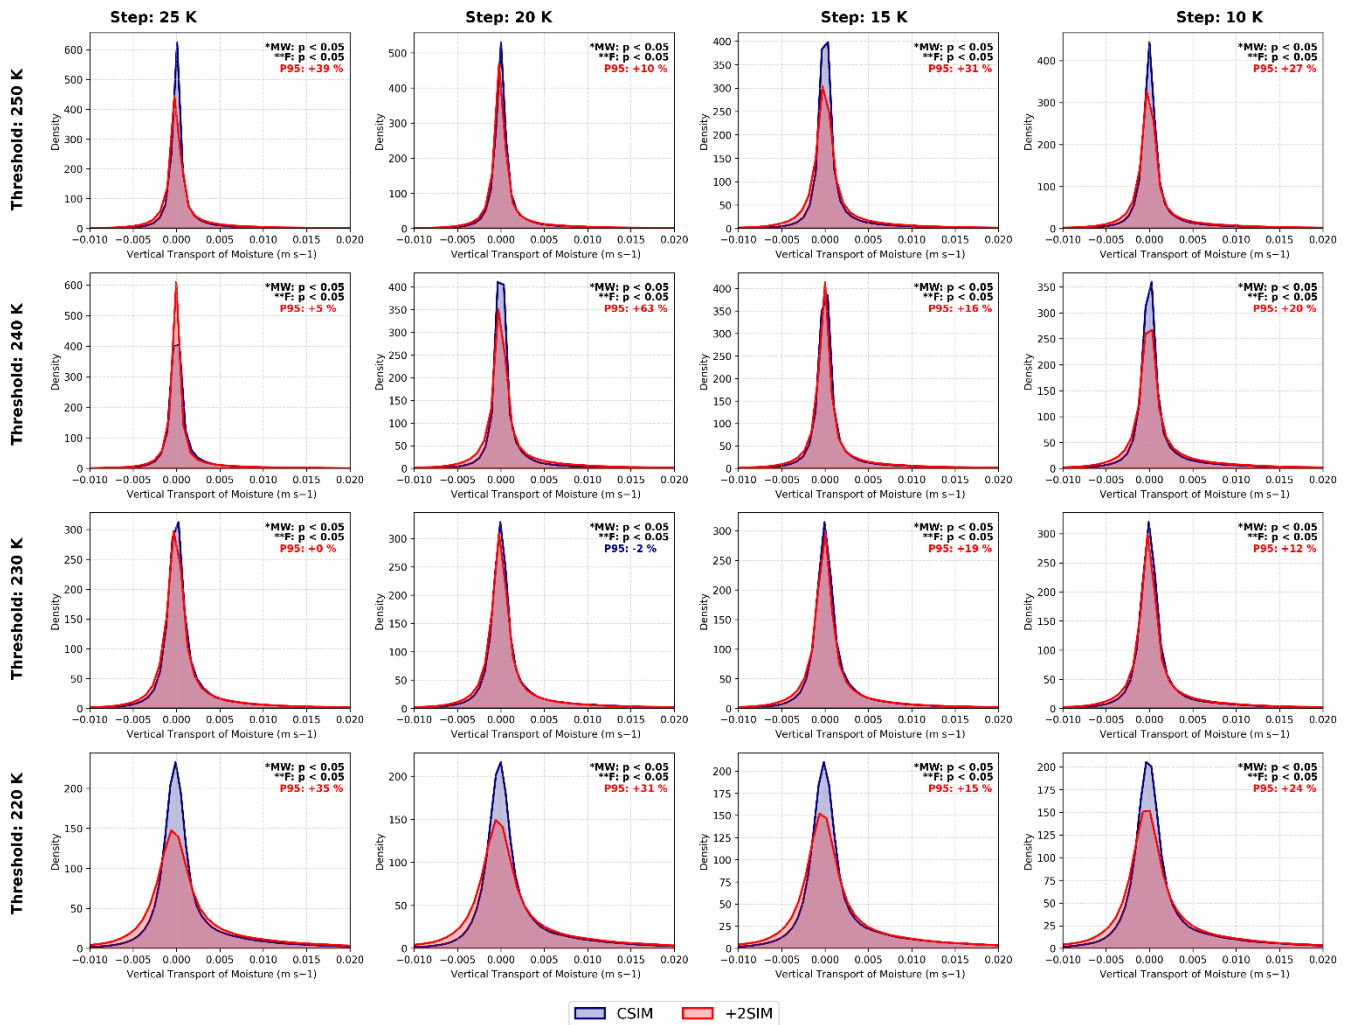

**Figure S9:** Same as Fig. S5 but for the  $wq$  at 700 hPa ( $\text{m s}^{-1}$ ). In the top-right corner it is indicated the percentage of change in +2SIM relative to CSIM in the 95th percentile of the distribution, in red when it is an increase and blue when it is a decrease.

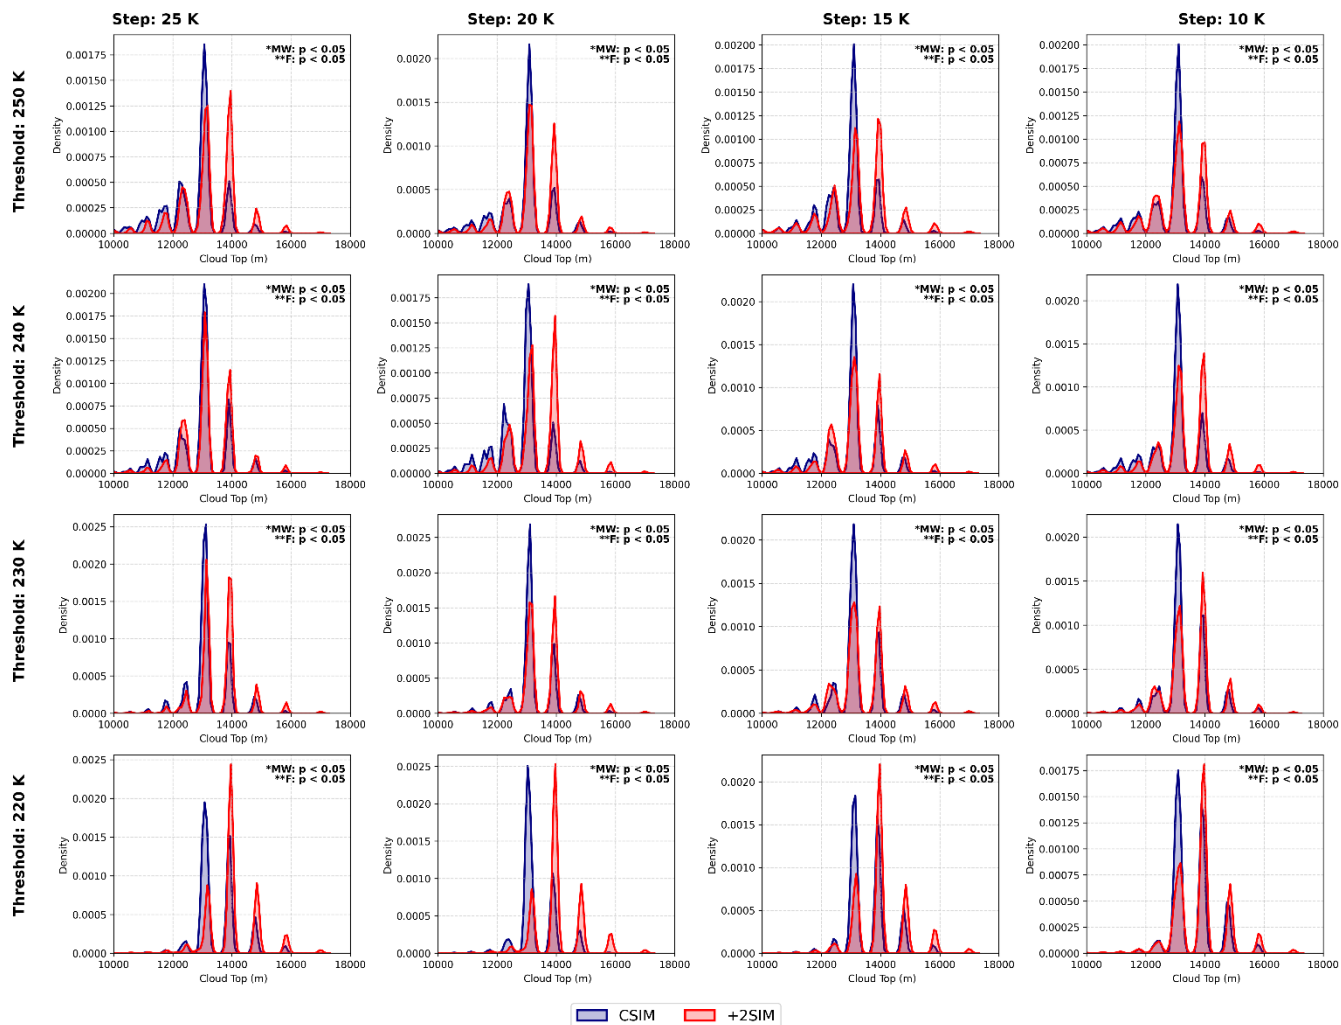

Figure S10: Same as Fig. S5 but for the CT (m).

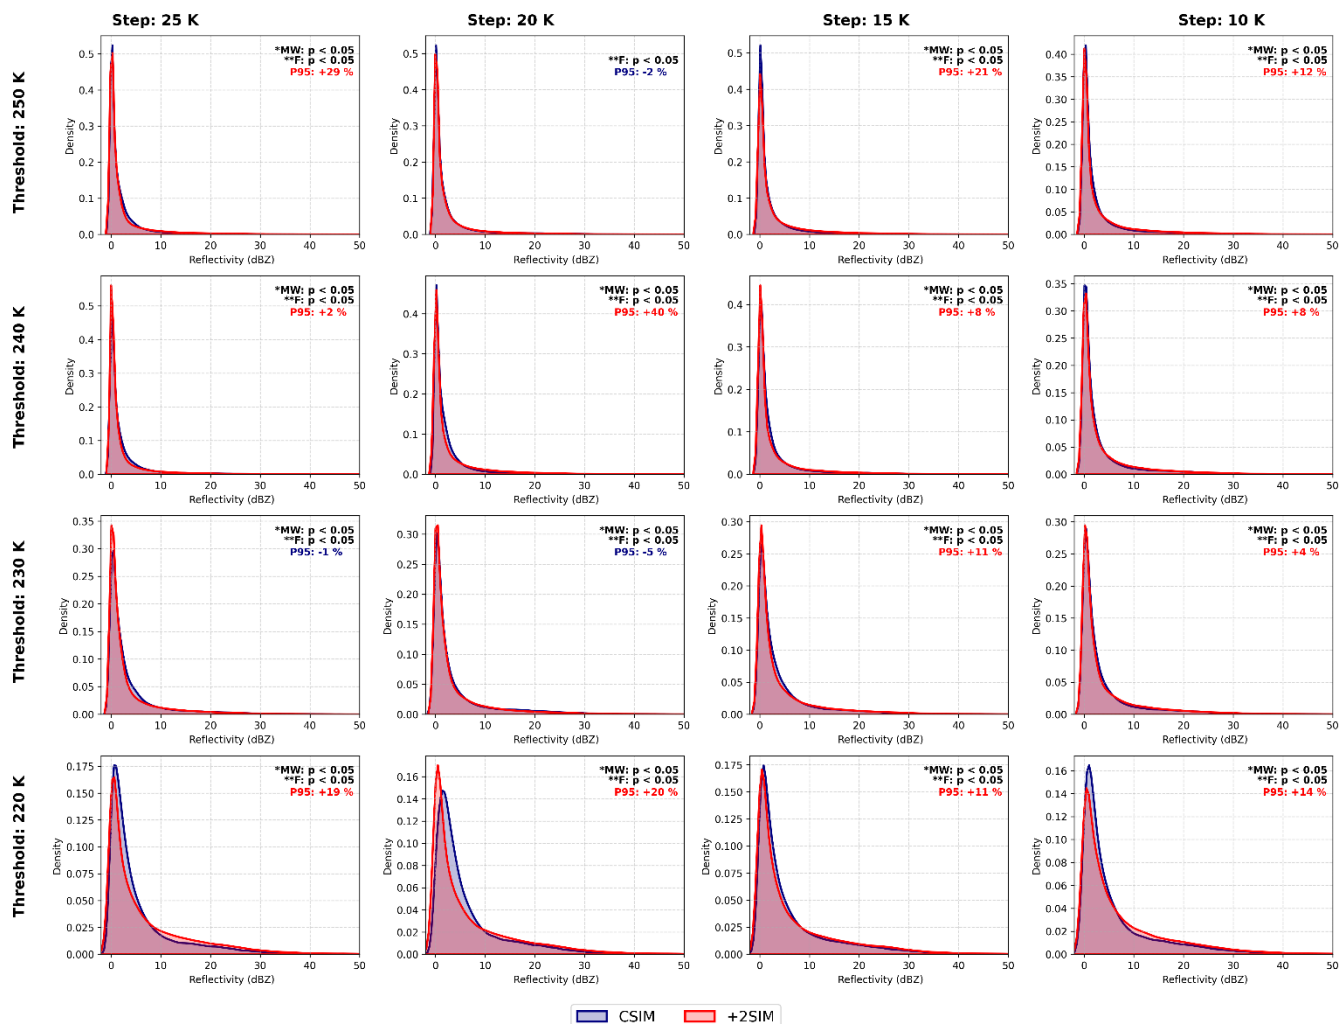

50 **Figure S11:** Same as Fig. S5 but for the Reff (dBZ). In the top-right corner it is indicated the percentage of change in +2SIM relative to CSIM in the 95th percentile of the distribution, in red when it is an increase and blue when it is a decrease.

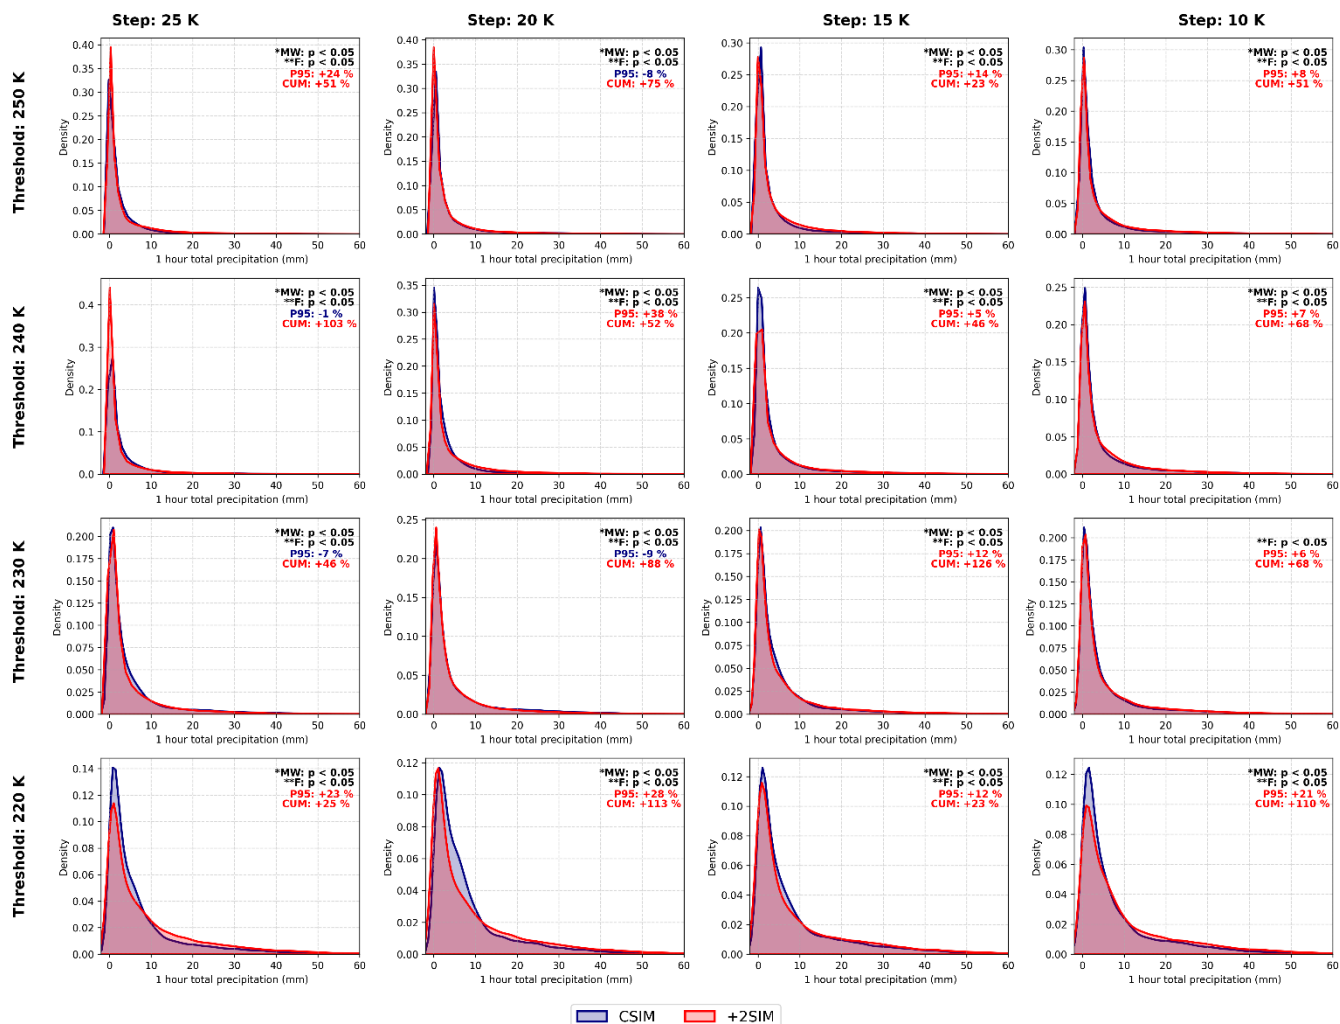

**Figure S12:** Same as Fig. S5 but for the mean TP (mm h<sup>-1</sup>). In the top-right corner it is indicated the percentage of change in +2SIM relative to CSIM in the 95th percentile of the distribution and the total accumulated precipitation in the convective cells; in red when it is an increase and blue when it is a decrease.

55
